# Supplementary material
Source: PubMed Central journal article supplement (PMC3484459)
Supplement: JCI65157sd.pdf [file JCI65157sd.pdf]

## **Supplemental Material for**

**Targeted deletion of *Vegfa* in adult induces vision loss**

Kurihara T. et al.

### **Supplemental Methods**

**Table S1-2**

**Figure S1-4**

## Supplemental Methods

### Animals

Transgenic mice carrying the human vitelliform macular dystrophy-2 (*VMD2*) promoter-directed reverse tetracycline-dependent transactivator (rtTA) and the tetracycline-responsive element (TRE)-directed Cre recombinase (*VMD2-Cre* mice) (13) (provided by Dr. Y.Z. Le of University of Oklahoma Health Sciences Center, Oklahoma City, USA) were mated with *Vegfa*<sup>fllox/fllox</sup> mice (29), *Hif1a*<sup>fllox/fllox</sup> mice (30), or *Epas1*<sup>fllox/fllox</sup> mice (31) (provided by Dr. R.S. Johnson of University of Cambridge, Cambridge, UK). Control littermates harboring floxed alleles but no Cre-recombinase were utilized after confirming phenotypic effects of doxycycline or Cre recombination activity in RPE (Fig. S1). To induce gene deletion, 80 µg/g body weight of doxycycline was injected into six to eight week-old adult transgenic mice intraperitoneally once a day for three days (counting began after the day of the first injection).

### Electron microscopy analysis

Eye cups containing the retina and choroid from each mouse were fixed in 4% paraformaldehyde plus 1.5% glutaraldehyde in 0.1 M cacodylate buffer overnight at

4°C followed by rinsing in 0.1 M Na cacodylate buffer for 1 hour. The eye cups were then postfixed in 1% OsO<sub>4</sub> in 0.1 M cacodylate buffer for 2 hours, followed by another 1-hour wash and dehydration with graded ethanol solutions. Samples were incubated overnight in a 1:2 mixture of propylene oxide and Epon/Araldite (Sigma-Aldrich) and then placed in 100% resin followed by embedding. The blocks were sectioned and used for high-magnification electron microscopy analysis.

### **Ganzfeld ERG**

After overnight dark adaptation, mice were anesthetized under dim red light by intraperitoneal injection of 15 mg/kg ketamine and 7 mg/kg xylazine. Full-field ERGs were recorded from the corneal surface of each eye after pupil dilation (1% tropicamide and 2.5% phenylephrine) using active contact lens electrodes (Mayo) placed on the cornea together with a mouth reference and tail ground electrode. A computerized system with an electronically controlled Ganzfeld dome was used (Espion E2 with Colordome; Diagnosys). In the dark-adapted state (scotopic), we recorded rod and mixed cone/rod responses to a series of white flashes of increasing intensities ( $1 \times 10^{-5}$  to 50 cd•s/m<sup>2</sup>). In the light-adapted state (photopic), with a 30 cd/m<sup>2</sup> background, cone responses to 1-Hz (0.63 to 20 cd•s/m<sup>2</sup>) and 30-Hz (3.98, 10, and 20 cd•s/m<sup>2</sup>) flicker

stimuli were recorded. All ERG responses were filtered at 0.3–500 Hz, and signal averaging was applied.

### **Immunohistochemistry**

Retinas or RPE/choroid complexes were dissected and prepared for whole mounts or sectioning. For preparation of retinal cross-sections, dissected retinas were laid flat with 4 radial relaxing incisions, placed in 4% PFA, and incubated at 4°C overnight. Retinas were then placed in 20% sucrose at 4°C for 4 hours and embedded in Tissue-Tek OCT compound (Sakura FineTechnical) for cryosectioning. Antibodies were purchased from Life Technologies and included red/green opsin (1:200), and rhodopsin (1:500). For RPE/choroid whole mount staining, fluorescent-conjugated isolectin Griffonia Simplicifolia IB-4 was used (GS-lectin; Life Technologies). Images were obtained using a confocal microscopy (LSM710, Carl Zeiss)

### **In vivo imaging**

Indocyanine green angiography and optical coherence tomography were performed using Spectralis (Heidelberg Engineering) as we previously described (33). Mice were anesthetized by an i.p. injection of 15 mg/kg ketamine and 7 mg/kg xylazine, and ICG

(50 µg/g body weight) was injected intraperitoneally. Pupils were dilated immediately before imaging with 1% tropicamide and 2.5% phenylephrine.

### **Transcriptomic arrays**

For mRNA arrays, total RNA was prepared from RPE/choroid complexes using the RNeasy Plus Mini kit (Qiagen) and was reverse transcribed using RT<sup>2</sup> First Strand cDNA Kit (Qiagen). mRNA PCR arrays for hypoxia signaling, glucose metabolism, and fatty acid metabolism (Mouse Angiogenesis RT<sup>2</sup> Profiler™ PCR Array, PAMM-024, Qiagen) were performed according to the manufacturer's instructions. Quantitative PCR assays were performed on a real-time PCR System (ABI 7900HT Fast, Life Technologies).

### **Laser-induced CNV**

Laser photocoagulation was performed at four spots per eye around the optic disk with the wavelength of 532 nm, the power of 200 mW, the duration of 100 ms, and the spot size of 75 µm, using a slit-lamp laser photocoagulation system (Novus Spectra; Lumenis) as previously described (34). One week after laser injury, mice were sacrificed and RPE/choroid whole mounts were prepared for CNV volume

quantification. For mRNA array analysis, RPE/choroid complexes were obtained 3 days after laser irradiation. Horizontal optical sections of CNV were obtained every 1  $\mu\text{m}$  step from the surface to the deepest focal plane. The area of CNV was measured by ImageJ (National Institutes of Health) and accumulated to obtain the volume.

### **Statistical analysis**

Comparisons between the mean variables of two groups were performed by a two-tailed Student's t-test for mRNA arrays (RT<sup>2</sup> Profiler PCR Array Data Analysis Template v3.3; Qiagen), or others (Excel; Microsoft). *P* value less than 0.05 was considered significant.

### **Study approval**

All procedures involving animals were approved by the Scripps Research Institute Animal Care Committee that ensures all federal animal experimentation guidelines are met.

**Table S1.** Complete data sets from qPCR gene-profiling analyses of 84 angiogenesis-related genes in naïve *Vegfa*, *Hif1a*, *Epas1*, and *Hif1a;Epas1* mutant RPE/Choroids 3 days post-induction.

| Symbol  | Description                                | <i>Vegfa</i> |          | <i>Hif1a</i> |          | <i>Epas1</i> |          | <i>Hif1a;Epas1</i> |          |
|---------|--------------------------------------------|--------------|----------|--------------|----------|--------------|----------|--------------------|----------|
|         |                                            | Fold change  | p-value  | Fold change  | p-value  | Fold change  | p-value  | Fold change        | p-value  |
| Angpt1  | Angiopoietin 1                             | -1.34        | 0.413585 | 1.44         | 0.26444  | 1.89         | 0.009391 | 1.03               | 0.753598 |
| Angpt2  | Angiopoietin 2                             | 1.3          | 0.141577 | 1.69         | 0.153693 | 1.5          | 0.272844 | 1.04               | 0.953264 |
| Anpep   | Alanyl (membrane)<br>aminopeptidase        | -1.41        | 0.003938 | -1.75        | 0.111973 | -1.26        | 0.373745 | 1.28               | 0.375612 |
| Bai1    | Brain-specific angiogenesis<br>inhibitor 1 | 1.47         | 0.223936 | 1.18         | 0.61102  | 1.57         | 0.306897 | 1.52               | 0.540079 |
| Ccl11   | Chemokine (C-C motif) ligand<br>11         | 1.65         | 0.021573 | 1.49         | 0.206098 | 1.93         | 0.001735 | -1.31              | 0.307342 |
| Ccl2    | Chemokine (C-C motif) ligand 2             | -1.96        | 0.221456 | 1.03         | 0.935642 | 1.25         | 0.475604 | -1.1               | 0.648763 |
| Cdh5    | Cadherin 5                                 | -1.53        | 0.214256 | -1.14        | 0.521722 | 1.16         | 0.413375 | 1.12               | 0.48664  |
| Col18a1 | Collagen, type XVIII, alpha 1              | -1.73        | 0.000268 | -1.23        | 0.422148 | 1.49         | 0.302076 | 1.23               | 0.584866 |
| Col4a3  | Collagen, type IV, alpha 3                 | -1.18        | 0.543812 | 1.12         | 0.764706 | 1.42         | 0.403871 | 1.25               | 0.119333 |

|       |                                                  |       |          |       |          |       |          |       |          |
|-------|--------------------------------------------------|-------|----------|-------|----------|-------|----------|-------|----------|
| Csf3  | Colony stimulating factor 3<br><br>(granulocyte) | 1.1   | 0.281964 | -1.05 | 0.921171 | 1.18  | 0.763564 | 1.26  | 0.317169 |
| Ctgf  | Connective tissue growth factor                  | 1.04  | 0.992852 | 1.22  | 0.201868 | 1.06  | 0.672108 | -1.24 | 0.660256 |
| Cxcl1 | Chemokine (C-X-C motif) ligand<br><br>1          | -1.76 | 0.008988 | 1.39  | 0.193077 | 1.33  | 0.20067  | -1.03 | 0.932115 |
| Cxcl2 | Chemokine (C-X-C motif) ligand<br><br>2          | 2.8   | 0.05201  | 2.02  | 0.176471 | 1.54  | 0.297605 | 1.59  | 0.281366 |
| Cxcl5 | Chemokine (C-X-C motif) ligand<br><br>5          | 1.22  | 0.7213   | 1.52  | 0.224189 | 1.87  | 0.010285 | -1.21 | 0.462104 |
| Tymp  | Thymidine phosphorylase                          | -3.8  | 0.001734 | 2.05  | 0.341018 | 2.69  | 0.179331 | -2.27 | 0.663608 |
| S1pr1 | Sphingosine-1-phosphate<br><br>receptor 1        | -1.12 | 0.635685 | 1.03  | 0.855271 | 1.07  | 0.652293 | 1.24  | 0.120569 |
| Efna1 | Ephrin A1                                        | -1.41 | 0.178414 | -1.41 | 0.121185 | -1.08 | 0.615045 | 1.11  | 0.548721 |
| Efnb2 | Ephrin B2                                        | -1.33 | 0.023749 | 1.15  | 0.371299 | 1.09  | 0.571925 | 1.14  | 0.488908 |
| Egf   | Epidermal growth factor                          | -1.12 | 0.766746 | -1.73 | 0.227011 | -1.49 | 0.28664  | -1.24 | 0.42069  |
| Eng   | Endoglin                                         | -1.38 | 0.252153 | -1.68 | 0.153268 | -1.22 | 0.406361 | 1.26  | 0.356316 |
| Epas1 | Endothelial PAS domain protein                   | -1.1  | 0.21504  | -2.25 | 0.076373 | -1.83 | 0.023472 | -2.97 | 0.086782 |



|       |                                                              |       |          |       |          |       |          |       |          |
|-------|--------------------------------------------------------------|-------|----------|-------|----------|-------|----------|-------|----------|
|       | 1                                                            |       |          |       |          |       |          |       |          |
| Ephb4 | Eph receptor B4                                              | -1.28 | 0.243319 | -1.28 | 0.274985 | -1.01 | 0.894101 | 1.21  | 0.265727 |
| Ereg  | Epiregulin                                                   | -1.46 | 0.002396 | -1.4  | 0.526383 | -1.52 | 0.280077 | 1.52  | 0.268226 |
| F2    | Coagulation factor II                                        | -1.82 | 0.124291 | 1.66  | 0.261644 | 1.35  | 0.364178 | -1.11 | 0.949614 |
| Fgf1  | Fibroblast growth factor 1                                   | -1.11 | 0.521759 | 1     | 0.972462 | 1.26  | 0.151424 | -1.25 | 0.149164 |
| Fgf2  | Fibroblast growth factor 2                                   | 1.23  | 0.019132 | 1.01  | 0.941347 | 1.29  | 0.310001 | -1.16 | 0.421374 |
| Fgf6  | Fibroblast growth factor 6                                   | -1.29 | 0.665944 | 1.23  | 0.408293 | -1.13 | 0.725849 | -1.27 | 0.798363 |
| Fgfr3 | Fibroblast growth factor receptor                            | -1.22 | 0.002325 | -1.6  | 0.257141 | -1.39 | 0.11319  | -1.14 | 0.416329 |
|       | 3                                                            |       |          |       |          |       |          |       |          |
| Figf  | C-fos induced growth factor                                  | -1.44 | 0.142495 | 1.72  | 0.096738 | 1.44  | 0.290538 | -1.34 | 0.672405 |
| Flt1  | FMS-like tyrosine kinase 1                                   | -1.08 | 0.032614 | 1.21  | 0.460796 | 1.29  | 0.314362 | 1.02  | 0.996145 |
| Fzd5  | Frizzled homolog 5 (Drosophila)                              | 1.16  | 0.020965 | 1.87  | 0.138911 | 1.35  | 0.219182 | -1.23 | 0.647013 |
| Gna13 | Guanine nucleotide binding<br>protein, alpha 13              | -1.46 | 0.094009 | 1.34  | 0.146115 | 1.21  | 0.283406 | 1     | 0.989866 |
| Hand2 | Heart and neural crest derivatives<br>expressed transcript 2 | -3.47 | 0.001427 | 1.81  | 0.220895 | 1.88  | 0.181627 | -1.97 | 0.523564 |

|       |                                           |       |          |       |          |       |          |       |          |
|-------|-------------------------------------------|-------|----------|-------|----------|-------|----------|-------|----------|
| Hgf   | Hepatocyte growth factor                  | -1.85 | 0.026597 | 1.19  | 0.449565 | 1.59  | 0.015265 | -1.03 | 0.457424 |
| Hif1a | Hypoxia inducible factor 1, alpha subunit | -1.05 | 0.684424 | -2.48 | 0.042448 | 1.95  | 0.065454 | -2.75 | 0.064844 |
| Ifng  | Interferon gamma                          | -2.49 | 0.139935 | 1.35  | 0.602779 | -1.22 | 0.722856 | 1.1   | 0.914201 |
| Igf1  | Insulin-like growth factor 1              | -1.92 | 0.00534  | 1.13  | 0.556216 | 1.41  | 0.080642 | 1.08  | 0.58172  |
| Il1b  | Interleukin 1 beta                        | 1.39  | 0.195485 | 1.94  | 0.161591 | 2.15  | 0.068343 | 1.25  | 0.413902 |
| Il6   | Interleukin 6                             | -1.78 | 0.009261 | 2.46  | 0.266808 | 1.85  | 0.162402 | -2.45 | 0.176681 |
| Itgav | Integrin alpha V                          | -1.78 | 0.000975 | 1.09  | 0.575465 | 1.26  | 0.053416 | -1.12 | 0.298615 |
| Itgb3 | Integrin beta 3                           | -2.65 | 0.000119 | -1.11 | 0.367033 | 1.2   | 0.299618 | 1.11  | 0.58626  |
| Jag1  | Jagged 1                                  | 1.17  | 0.109726 | 1.03  | 0.764804 | 1.08  | 0.34165  | 1.13  | 0.163439 |
| Kdr   | Kinase insert domain protein receptor     | -1.98 | 0.149414 | 1.11  | 0.602043 | 1.27  | 0.219733 | 1.29  | 0.174536 |
| Lama5 | Laminin, alpha 5                          | -1.44 | 0.002422 | -1.06 | 0.912131 | 1.34  | 0.167732 | 1.23  | 0.172055 |
| Lect1 | Leukocyte cell derived chemotaxin 1       | 1.23  | 0.180073 | 2.23  | 0.163337 | 1.95  | 0.258268 | -1.18 | 0.906    |
| Lep   | Leptin                                    | -1.37 | 0.212414 | 1.05  | 0.907086 | -1.87 | 0.370516 | -1.87 | 0.739498 |

|        |                                                      |       |          |       |          |       |          |       |          |
|--------|------------------------------------------------------|-------|----------|-------|----------|-------|----------|-------|----------|
| Mapk14 | Mitogen-activated protein kinase<br><br>14           | -1.52 | 0.002186 | -1.39 | 0.061261 | -1.09 | 0.783305 | 1.22  | 0.486672 |
| Mdk    | Midkine                                              | -1.36 | 0.00584  | 1.14  | 0.589354 | 1.36  | 0.173203 | -1.19 | 0.533306 |
| Mmp19  | Matrix metalloproteinase 19                          | -1.09 | 0.525064 | -1.18 | 0.352271 | 1.1   | 0.464103 | 1.18  | 0.344209 |
| Mmp2   | Matrix metalloproteinase 2                           | 1.02  | 0.973444 | 1.09  | 0.258416 | -1.21 | 0.473528 | -1.04 | 0.954624 |
| Mmp9   | Matrix metalloproteinase 9                           | 6.08  | 0.001287 | 1.35  | 0.118035 | 1.2   | 0.398476 | 1.24  | 0.161787 |
| Npr1   | Natriuretic peptide receptor 1                       | -1.48 | 0.076702 | -1.72 | 0.054433 | -1.25 | 0.444566 | 1.3   | 0.446015 |
| Nrp1   | Neuropilin 1                                         | -1.51 | 0.067765 | 1.08  | 0.551169 | 1.08  | 0.542382 | -1.08 | 0.761728 |
| Nrp2   | Neuropilin 2                                         | -1.45 | 0.007964 | -1.17 | 0.596789 | 1.39  | 0.351551 | 1.38  | 0.255685 |
| Pdgfa  | Platelet derived growth factor,<br><br>alpha         | -1.44 | 0.011454 | -1.64 | 0.091396 | -1.22 | 0.418402 | -1.04 | 0.817247 |
| Pecam1 | Platelet/endothelial cell adhesion<br><br>molecule 1 | -1.39 | 0.331894 | -1.2  | 0.245105 | 1.09  | 0.538363 | 1.08  | 0.598698 |
| Pgf    | Placental growth factor                              | -1.22 | 0.611459 | 1.01  | 0.958914 | 1.09  | 0.659936 | -1.19 | 0.449321 |
| Plau   | Plasminogen activator, urokinase                     | -1.46 | 0.041819 | -1.37 | 0.110929 | 1.09  | 0.673124 | 1.23  | 0.512246 |
| Plg    | Plasminogen                                          | -1.78 | 0.009261 | 1.81  | 0.220895 | 1.88  | 0.181627 | -1.97 | 0.523564 |

|          |                                                                |       |          |       |          |       |          |       |          |
|----------|----------------------------------------------------------------|-------|----------|-------|----------|-------|----------|-------|----------|
| Pldc1    | Plexin domain containing 1                                     | -1.93 | 0.067919 | 1.03  | 0.931484 | 1.38  | 0.277325 | 1.32  | 0.180729 |
| Ptgs1    | Prostaglandin-endoperoxide<br>synthase 1                       | -1.02 | 0.991682 | -1.1  | 0.393071 | -1.08 | 0.4896   | -1.09 | 0.534958 |
| Serpinf1 | Serine (or cysteine) peptidase<br>inhibitor, clade F, member 1 | -1.15 | 0.767346 | 1.22  | 0.393652 | 1.03  | 0.792538 | -1.15 | 0.842248 |
| Smad5    | MAD homolog 5 (Drosophila)                                     | 1.11  | 0.27548  | 1.73  | 0.153989 | 1.34  | 0.406406 | 1.01  | 0.991583 |
| Sphk1    | Sphingosine kinase 1                                           | 1.82  | 0.000616 | -1.55 | 0.063739 | -1.2  | 0.298705 | 1.07  | 0.706168 |
| Stab1    | Stabilin 1                                                     | -1.33 | 0.315313 | -1.54 | 0.076955 | -1.18 | 0.387896 | 1.07  | 0.686033 |
| Tbx1     | T-box 1                                                        | -1.22 | 0.485835 | 1.17  | 0.477756 | -1.08 | 0.988315 | 1.11  | 0.844596 |
| Tbx4     | T-box 4                                                        | -1.45 | 0.325003 | -1.46 | 0.189404 | -1.72 | 0.275038 | 1.78  | 0.21975  |
| Tek      | Endothelial-specific receptor<br>tyrosine kinase               | 1.07  | 0.515444 | 1.53  | 0.172147 | 1.22  | 0.492206 | -1.03 | 0.974651 |
| Tgfa     | Transforming growth factor alpha                               | -1.37 | 0.209927 | -1.45 | 0.088639 | -1.08 | 0.867723 | -1.12 | 0.566362 |
| Tgfb1    | Transforming growth factor, beta<br>1                          | -1.95 | 0.118792 | -1.29 | 0.300013 | 1.1   | 0.695248 | 1.48  | 0.181421 |
| Tgfb2    | Transforming growth factor, beta<br>2                          | -1.49 | 0.000042 | -1.09 | 0.740676 | 1.56  | 0.212142 | 1     | 0.907187 |

|         |                                                              |       |          |       |          |       |          |       |          |
|---------|--------------------------------------------------------------|-------|----------|-------|----------|-------|----------|-------|----------|
| Tgfb3   | Transforming growth factor, beta<br><br>3                    | -1.25 | 0.719313 | -1.33 | 0.166582 | 1.03  | 0.930625 | 1.26  | 0.305778 |
| Tgfb1   | Transforming growth factor, beta<br><br>receptor I           | 1.75  | 0.00853  | -1.2  | 0.23823  | -1.01 | 0.856686 | 1.08  | 0.475733 |
| Thbs1   | Thrombospondin 1                                             | -1.78 | 0.000632 | 1.29  | 0.309703 | 1.54  | 0.110338 | -1.15 | 0.51713  |
| Thbs2   | Thrombospondin 2                                             | -1.3  | 0.316161 | 1.04  | 0.869902 | -1    | 0.990211 | 1.27  | 0.33332  |
| Timp1   | Tissue inhibitor of<br><br>metalloproteinase 1               | -1.77 | 0.111267 | 1.12  | 0.81787  | 1.4   | 0.485571 | 1.15  | 0.454325 |
| Timp2   | Tissue inhibitor of<br><br>metalloproteinase 2               | -1.4  | 0.042988 | -1.2  | 0.384877 | 1.17  | 0.41614  | 1.08  | 0.596163 |
| Tmprss6 | Transmembrane serine protease 6                              | -2.24 | 0.024009 | 1.2   | 0.432868 | -1.17 | 0.343052 | 1.54  | 0.194879 |
| Tnf     | Tumor necrosis factor                                        | -2.15 | 0.004883 | -1.08 | 0.65297  | 1.19  | 0.484798 | 1.02  | 0.816678 |
| Tnfaip2 | Tumor necrosis factor,<br><br>alpha-induced protein 2        | -3.26 | 0.000447 | -1.66 | 0.056905 | 1.06  | 0.699477 | 1.68  | 0.283888 |
| Tnfsf12 | Tumor necrosis factor (ligand)<br><br>superfamily, member 12 | -1.44 | 0.098118 | -1.12 | 0.67804  | 1.11  | 0.797424 | 1.2   | 0.413639 |
| Vegfa   | Vascular endothelial growth                                  | -1.41 | 0.047516 | -1.09 | 0.716375 | 1.39  | 0.362673 | 1.09  | 0.739881 |

|       |                                         |       |          |       |          |       |          |       |          |
|-------|-----------------------------------------|-------|----------|-------|----------|-------|----------|-------|----------|
|       | factor A                                |       |          |       |          |       |          |       |          |
| Vegfb | Vascular endothelial growth<br>factor B | -1.83 | 0.000006 | -1.45 | 0.080076 | -1.12 | 0.759113 | 1.16  | 0.66229  |
| Vegfc | Vascular endothelial growth<br>factor C | -1.71 | 0.016196 | 1.64  | 0.164829 | 1.65  | 0.134874 | -1.04 | 0.922215 |

Fold-change and p-values are listed. Note that 32 of 84 genes are significantly downregulated in *Vegf* mutants whereas few or no significantly dysregulated genes are observed in *Hif1a*, *Epas1*, or *Hif1a;Epas1* mutants. This table is associated with Figure 2F and Figure S2C.

**Table S2. Complete data sets from qPCR gene-profiling analyses of 84 angiogenesis-related genes in laser-irradiated B6 wild-type, *Vegfa*, *Hif1a*, *Epas1*, and *Hif1a;Epas1* mutant RPE/Choroids 3 days post laser irradiation.**

| Symbol | Description                                           | Laser:B6    |          | Laser: <i>Vegfa</i> |          | Laser: <i>Hif1a</i> |          | Laser: <i>Epas1</i> |          | Laser: <i>Hif1a;Epas1</i> |          |
|--------|-------------------------------------------------------|-------------|----------|---------------------|----------|---------------------|----------|---------------------|----------|---------------------------|----------|
|        |                                                       | Fold change | p-value  | Fold change         | p-value  | Fold change         | p-value  | Fold change         | p-value  | Fold change               | p-value  |
| Angpt1 | Angiopoietin 1                                        | 2.57        | 0.057941 | -2.96               | 0.046532 | 1.92                | 0.006742 | 1.95                | 0.017546 | 1.66                      | 0.080341 |
| Angpt2 | Angiopoietin 2                                        | 1.37        | 0.05142  | -1.54               | 0.05124  | 1.72                | 0.139743 | 1.56                | 0.228228 | 1.96                      | 0.033683 |
| Anpep  | Alanyl<br><br>(membrane)<br><br>aminopeptidase        | 1.01        | 0.912503 | -1.34               | 0.146721 | -1.58               | 0.270667 | 1.02                | 0.891484 | -1.81                     | 0.092354 |
| Bai1   | Brain-specific<br><br>angiogenesis<br><br>inhibitor 1 | 4.78        | 0.13157  | 1.14                | 0.658676 | 1.98                | 0.13333  | 2.39                | 0.17993  | 3.41                      | 0.319957 |
| Ccl11  | Chemokine (C-C<br><br>motif) ligand 11                | 1.61        | 0.234886 | -2.74               | 0.101953 | 1.93                | 0.001806 | 1.47                | 0.189679 | 1.52                      | 0.181263 |
| Ccl2   | Chemokine (C-C                                        | -2.64       | 0.063335 | 3.52                | 0.00462  | -1.05               | 0.725322 | 1.14                | 0.635614 | -1.18                     | 0.399753 |

|         |                                           |      |          |       |          |      |          |       |          |       |          |
|---------|-------------------------------------------|------|----------|-------|----------|------|----------|-------|----------|-------|----------|
|         | motif) ligand 2                           |      |          |       |          |      |          |       |          |       |          |
| Cdh5    | Cadherin 5                                | 1.17 | 0.37307  | -1.11 | 0.915541 | 1.01 | 0.959844 | 1.29  | 0.301618 | -1.1  | 0.617451 |
| Col18a1 | Collagen, type XVIII, alpha 1             | 1.17 | 0.602362 | 1.2   | 0.585704 | 1.24 | 0.537785 | 1.84  | 0.140498 | -1.11 | 0.596432 |
| Col4a3  | Collagen, type IV, alpha 3                | 2.31 | 0.083459 | -2.82 | 0.041117 | 1.52 | 0.273024 | 1.77  | 0.105407 | 1.67  | 0.16291  |
| Csf3    | Colony stimulating factor 3 (granulocyte) | 3.99 | 0.097507 | -1.38 | 0.514474 | 1.15 | 0.816387 | 1.49  | 0.285888 | 1.45  | 0.349808 |
| Ctgf    | Connective tissue growth factor           | 1.34 | 0.069779 | -1.89 | 0.027443 | 1.08 | 0.618947 | -1.18 | 0.826803 | 1.21  | 0.250068 |
| Cxcl1   | Chemokine (C-X-C motif) ligand 1          | 1.24 | 0.241744 | -1.39 | 0.17266  | 1.51 | 0.063183 | 1.29  | 0.257639 | 1.49  | 0.075625 |
| Cxcl2   | Chemokine                                 | 2.1  | 0.02792  | 1.12  | 0.584274 | 2.18 | 0.138152 | 2.46  | 0.004525 | 2.61  | 0.04226  |



|       |                                                   |      |          |       |          |       |          |       |          |       |          |
|-------|---------------------------------------------------|------|----------|-------|----------|-------|----------|-------|----------|-------|----------|
|       | (C-X-C motif)<br>ligand 2                         |      |          |       |          |       |          |       |          |       |          |
| Cxcl5 | Chemokine<br><br>(C-X-C motif)<br>ligand 5        | 2.13 | 0.050167 | 2.18  | 0.082495 | 1.93  | 0.010344 | 1.54  | 0.148668 | 1.69  | 0.104002 |
| Tymp  | Thymidine<br><br>phosphorylase                    | 1.65 | 0.263812 | -2.8  | 0.199849 | 2.92  | 0.156751 | 1.18  | 0.502378 | 2.42  | 0.256395 |
| S1pr1 | Sphingosine-1-p<br><br>hosphate<br><br>receptor 1 | 1.15 | 0.291132 | 1.15  | 0.349519 | 1.15  | 0.245082 | 1.32  | 0.096291 | 1.23  | 0.161164 |
| Efna1 | Ephrin A1                                         | 1.44 | 0.082963 | -1.76 | 0.03905  | -1.29 | 0.329561 | 1.03  | 0.877287 | -1.31 | 0.278728 |
| Efnb2 | Ephrin B2                                         | 1.62 | 0.018249 | -1.76 | 0.039774 | 1.12  | 0.451908 | 1.25  | 0.097188 | 1.28  | 0.162856 |
| Egf   | Epidermal<br><br>growth factor                    | 1.37 | 0.221431 | -1.94 | 0.01368  | -1.73 | 0.227785 | -1.85 | 0.083132 | -1.78 | 0.181653 |
| Eng   | Endoglin                                          | 1    | 0.902595 | -1.23 | 0.470544 | -1.53 | 0.250117 | 1.04  | 0.910484 | -1.62 | 0.177374 |
| Epas1 | Endothelial PAS<br><br>domain protein 1           | 2.06 | 0.022265 | -2.3  | 0.013643 | -1.92 | 0.439279 | -1.08 | 0.864998 | -2.5  | 0.016982 |

|       |                                           |      |          |       |          |       |          |       |          |       |          |
|-------|-------------------------------------------|------|----------|-------|----------|-------|----------|-------|----------|-------|----------|
| Ephb4 | Eph receptor B4                           | 1.29 | 0.121482 | -1.38 | 0.128263 | -1.14 | 0.622658 | 1.2   | 0.358955 | -1.17 | 0.500847 |
| Ereg  | Epiregulin                                | 3    | 0.028354 | -3.26 | 0.211804 | -2.03 | 0.181703 | -1    | 0.957754 | -1.49 | 0.379243 |
| F2    | Coagulation<br>factor II                  | 1.49 | 0.280163 | -1.5  | 0.321263 | 2.05  | 0.103782 | 1.22  | 0.489206 | 2.94  | 0.021281 |
| Fgf1  | Fibroblast<br>growth factor 1             | 1.38 | 0.028139 | -2.14 | 0.002063 | 1.21  | 0.255498 | 1.01  | 0.945855 | 1.11  | 0.264553 |
| Fgf2  | Fibroblast<br>growth factor 2             | 1.5  | 0.024565 | 1.59  | 0.378702 | 1.33  | 0.253699 | 1.11  | 0.533719 | 1.41  | 0.267783 |
| Fgf6  | Fibroblast<br>growth factor 6             | 1.04 | 0.804206 | -1.42 | 0.2721   | 1.22  | 0.430693 | -1.43 | 0.594782 | 1.32  | 0.252486 |
| Fgfr3 | Fibroblast<br>growth factor<br>receptor 3 | 2.46 | 0.00103  | -6.44 | 0.0002   | -1.82 | 0.048641 | -1.58 | 0.047745 | -1.97 | 0.0229   |
| Figf  | C-fos induced<br>growth factor            | 1.46 | 0.175267 | -2.45 | 0.04448  | 1.74  | 0.085426 | 1.07  | 0.715401 | 1.37  | 0.355226 |
| Flt1  | FMS-like<br>tyrosine kinase 1             | 1.85 | 0.01781  | -1.63 | 0.031457 | 1.57  | 0.028948 | 1.31  | 0.208924 | 1.7   | 0.033709 |

|       |                                                                                |      |          |       |          |       |          |       |          |       |          |
|-------|--------------------------------------------------------------------------------|------|----------|-------|----------|-------|----------|-------|----------|-------|----------|
| Fzd5  | Frizzled<br><br>homolog 5<br><br>(Drosophila)                                  | 1.98 | 0.033488 | -1.5  | 0.19988  | 1.83  | 0.160578 | 1.1   | 0.646884 | 2.36  | 0.016301 |
| Gna13 | Guanine<br><br>nucleotide<br><br>binding protein,<br><br>alpha 13              | 1.12 | 0.128566 | -1.18 | 0.187415 | 1.37  | 0.102802 | 1.21  | 0.285464 | 1.45  | 0.020269 |
| Hand2 | Heart and neural<br><br>crest derivatives<br><br>expressed<br><br>transcript 2 | 1.51 | 0.288951 | -2.27 | 0.038986 | 2.24  | 0.051986 | -1.05 | 0.764433 | 1.77  | 0.242934 |
| Hgf   | Hepatocyte<br><br>growth factor                                                | 1.53 | 0.037423 | -1.12 | 0.461606 | 1.51  | 0.029126 | 1.54  | 0.017156 | 1.25  | 0.300628 |
| Hif1a | Hypoxia<br><br>inducible factor<br><br>1, alpha subunit                        | 1.91 | 0.024459 | -1.28 | 0.393287 | 1.03  | 0.852512 | 1.79  | 0.13696  | 1.03  | 0.866506 |
| Ifng  | Interferon<br><br>gamma                                                        | 3.56 | 0.115383 | -1.82 | 0.401328 | -1.22 | 0.73003  | -1.11 | 0.792213 | -1.04 | 0.815723 |

|       |                                                     |       |          |       |          |       |          |      |          |       |          |
|-------|-----------------------------------------------------|-------|----------|-------|----------|-------|----------|------|----------|-------|----------|
| Igf1  | Insulin-like<br><br>growth factor 1                 | 1.11  | 0.534525 | -1.06 | 0.775955 | 1.41  | 0.077788 | 1.51 | 0.034317 | 1.12  | 0.596252 |
| Il1b  | Interleukin 1<br><br>beta                           | 1.29  | 0.259766 | 2.12  | 0.010205 | 2.27  | 0.05898  | 2.68 | 0.003409 | 2.44  | 0.024125 |
| Il6   | Interleukin 6                                       | 3.04  | 0.084168 | 3.44  | 0.003022 | 5.76  | 0.025789 | 3.02 | 0.257088 | 4.44  | 0.086696 |
| Itgav | Integrin alpha V                                    | 1.29  | 0.103654 | -1.78 | 0.008177 | 1.23  | 0.089362 | 1.12 | 0.404731 | 1.1   | 0.523141 |
| Itgb3 | Integrin beta 3                                     | -1.42 | 0.081734 | 2.07  | 0.062591 | 1.04  | 0.806912 | 1.33 | 0.209792 | -1.1  | 0.390195 |
| Jag1  | Jagged 1                                            | 1.79  | 0.010227 | -1.61 | 0.015978 | 1.09  | 0.310078 | 1.22 | 0.076253 | 1.22  | 0.168749 |
| Kdr   | Kinase insert<br><br>domain protein<br><br>receptor | 2.22  | 0.00659  | -1.56 | 0.265214 | 1.38  | 0.064886 | 1.65 | 0.05184  | 1.71  | 0.190047 |
| Lama5 | Laminin, alpha 5                                    | 1.89  | 0.06323  | -1.73 | 0.083275 | 1.19  | 0.468758 | 1.65 | 0.021394 | 1.24  | 0.41487  |
| Lect1 | Leukocyte cell<br><br>derived<br><br>chemotaxin 1   | 2.09  | 0.015802 | 1.41  | 0.391283 | 2.51  | 0.101613 | 1.66 | 0.36051  | 3.26  | 0.010073 |
| Lep   | Leptin                                              | -2.11 | 0.222252 | -2.94 | 0.038311 | -1.57 | 0.416211 | -3.5 | 0.293085 | -1.56 | 0.419556 |
| Mapk1 | Mitogen-activate                                    | 3.67  | 0.347047 | -3.31 | 0.35245  | -1.19 | 0.624873 | 1.12 | 0.550152 | -1.22 | 0.477269 |

|       |                                              |       |          |       |          |       |          |       |          |       |          |
|-------|----------------------------------------------|-------|----------|-------|----------|-------|----------|-------|----------|-------|----------|
| 4     | d protein kinase<br><br>14                   |       |          |       |          |       |          |       |          |       |          |
| Mdk   | Midkine                                      | 1.09  | 0.665321 | -1.74 | 0.050924 | 1.4   | 0.116013 | 1.14  | 0.594596 | 1.09  | 0.672684 |
| Mmp19 | Matrix<br><br>metallopeptidase<br><br>19     | -1.43 | 0.053628 | 2.1   | 0.014539 | -1.05 | 0.918663 | 1.3   | 0.188734 | -1.18 | 0.340211 |
| Mmp2  | Matrix<br><br>metallopeptidase<br><br>2      | -1.38 | 0.28124  | 1.1   | 0.783382 | -1.08 | 0.802783 | -1.27 | 0.486299 | -1.1  | 0.767007 |
| Mmp9  | Matrix<br><br>metallopeptidase<br><br>9      | -1.99 | 0.048716 | 4.1   | 0.000325 | 1.32  | 0.166741 | 1.48  | 0.066224 | 1.29  | 0.211685 |
| Npr1  | Natriuretic<br><br>peptide receptor<br><br>1 | 1.57  | 0.024154 | -1.99 | 0.006672 | -1.56 | 0.256495 | 1.04  | 0.686993 | -1.75 | 0.041399 |
| Nrp1  | Neuropilin 1                                 | 1.15  | 0.085876 | -1.72 | 0.012036 | 1.1   | 0.44379  | 1     | 0.901313 | 1.04  | 0.742057 |
| Nrp2  | Neuropilin 2                                 | 1.41  | 0.314607 | -1.03 | 0.972071 | 1.21  | 0.642517 | 1.91  | 0.13872  | 1.12  | 0.844816 |

|        |                                                              |       |          |       |          |       |          |       |          |       |          |
|--------|--------------------------------------------------------------|-------|----------|-------|----------|-------|----------|-------|----------|-------|----------|
| Pdgfa  | Platelet derived<br><br>growth factor,<br><br>alpha          | 1.17  | 0.577385 | -1.76 | 0.064186 | -1.41 | 0.29322  | -1.26 | 0.313953 | -1.59 | 0.107665 |
| Pecam1 | Platelet/endotheli<br><br>al cell adhesion<br><br>molecule 1 | 1.13  | 0.37447  | -1.01 | 0.904282 | -1.05 | 0.840281 | 1.18  | 0.382615 | -1.15 | 0.364842 |
| Pgf    | Placental growth<br><br>factor                               | 2.34  | 0.001013 | -3.27 | 0.00002  | 1.11  | 0.579278 | -1.09 | 0.738939 | 1.07  | 0.761351 |
| Plau   | Plasminogen<br><br>activator,<br><br>urokinase               | -1.16 | 0.440409 | 1.19  | 0.275189 | -1.11 | 0.881508 | 1.34  | 0.33306  | -1.43 | 0.07604  |
| Plg    | Plasminogen                                                  | 1.63  | 0.190497 | -1.46 | 0.425618 | 2.24  | 0.051986 | -1.05 | 0.764433 | 1.77  | 0.242934 |
| Plxdc1 | Plexin domain<br><br>containing 1                            | 1.74  | 0.064956 | -1.67 | 0.011138 | 1.35  | 0.331619 | 1.82  | 0.088922 | 1.34  | 0.338324 |
| Ptgs1  | Prostaglandin-en<br><br>doperoxide<br><br>synthase 1         | -1.01 | 0.988621 | -1.16 | 0.639899 | -1.17 | 0.198172 | -1.17 | 0.273266 | -1.23 | 0.170454 |

|          |                                                             |       |          |       |          |       |          |       |          |       |          |
|----------|-------------------------------------------------------------|-------|----------|-------|----------|-------|----------|-------|----------|-------|----------|
| Serpinf1 | Serine (or cysteine) peptidase inhibitor, clade F, member 1 | 1.21  | 0.432409 | -1.61 | 0.244268 | 1.17  | 0.481661 | -1.11 | 0.983738 | 1.29  | 0.257899 |
| Smad5    | MAD homolog 5 (Drosophila)                                  | 1.13  | 0.304517 | -1.31 | 0.112165 | 1.75  | 0.146554 | 1.35  | 0.396208 | 2.08  | 0.021344 |
| Sphk1    | Sphingosine kinase 1                                        | -1.6  | 0.025418 | 2.11  | 0.004773 | -1.47 | 0.159925 | -1.12 | 0.585103 | -1.25 | 0.795537 |
| Stab1    | Stabilin 1                                                  | -1.87 | 0.023241 | 1.65  | 0.007652 | -1.41 | 0.212775 | -1.1  | 0.686066 | -1.5  | 0.105999 |
| Tbx1     | T-box 1                                                     | 1.45  | 0.138808 | -2.77 | 0.019578 | 1.15  | 0.509278 | 1.03  | 0.796658 | 1.28  | 0.203823 |
| Tbx4     | T-box 4                                                     | -1.27 | 0.216735 | -1.33 | 0.359745 | -1.38 | 0.279126 | 1.04  | 0.906345 | -1.45 | 0.196282 |
| Tek      | Endothelial-specific receptor tyrosine kinase               | 1.3   | 0.174357 | -1.76 | 0.057893 | 1.51  | 0.188427 | 1.18  | 0.529869 | 1.65  | 0.085987 |
| Tgfa     | Transforming growth factor                                  | 1.22  | 0.359958 | -1.73 | 0.038839 | -1.18 | 0.731784 | -1.2  | 0.240011 | -1.54 | 0.060224 |

|       |                                                           |       |          |       |          |       |          |      |          |       |          |
|-------|-----------------------------------------------------------|-------|----------|-------|----------|-------|----------|------|----------|-------|----------|
|       | alpha                                                     |       |          |       |          |       |          |      |          |       |          |
| Tgfb1 | Transforming<br><br>growth factor,<br><br>beta 1          | -1.24 | 0.282994 | 1.79  | 0.172222 | -1.13 | 0.647655 | 1.63 | 0.167413 | -1.1  | 0.771215 |
| Tgfb2 | Transforming<br><br>growth factor,<br><br>beta 2          | 1.77  | 0.097776 | -1.11 | 0.530064 | 1.38  | 0.390542 | 1.56 | 0.10157  | 1.29  | 0.427717 |
| Tgfb3 | Transforming<br><br>growth factor,<br><br>beta 3          | 2.19  | 0.00564  | -1.35 | 0.130105 | -1.17 | 0.490896 | 1.3  | 0.322933 | -1.17 | 0.490401 |
| Tgfb1 | Transforming<br><br>growth factor,<br><br>beta receptor I | -1.03 | 0.743069 | -1.2  | 0.203423 | -1.14 | 0.463365 | 1.07 | 0.606902 | -1.2  | 0.253441 |
| Thbs1 | Thrombospondin<br><br>1                                   | 1.42  | 0.048525 | -1.32 | 0.117466 | 1.41  | 0.130259 | 1.34 | 0.189948 | 1.48  | 0.058028 |
| Thbs2 | Thrombospondin<br><br>2                                   | -1.25 | 0.28693  | 1.63  | 0.155006 | 1.03  | 0.907846 | 1.26 | 0.311824 | 1.1   | 0.687203 |



|         |                                                                     |      |          |       |          |       |          |      |          |       |          |
|---------|---------------------------------------------------------------------|------|----------|-------|----------|-------|----------|------|----------|-------|----------|
| Timp1   | Tissue inhibitor<br><br>of<br><br>metalloproteinase 1               | 1.07 | 0.969056 | 1.58  | 0.209083 | 1.37  | 0.524299 | 1.61 | 0.260269 | 1.92  | 0.202499 |
| Timp2   | Tissue inhibitor<br><br>of<br><br>metalloproteinase 2               | 1.43 | 0.052325 | -1.45 | 0.016679 | 1.01  | 0.939825 | 1.25 | 0.300803 | -1.09 | 0.63906  |
| Tmprss6 | Transmembrane<br><br>serine protease 6                              | 2.01 | 0.011828 | -1.92 | 0.181311 | 1.02  | 0.774773 | 1.32 | 0.302661 | 1.63  | 0.236838 |
| Tnf     | Tumor necrosis<br><br>factor                                        | 4.62 | 0.021121 | -3.35 | 0.03585  | 1.09  | 0.767532 | 1.21 | 0.425631 | 1.13  | 0.652939 |
| Tnfaip2 | Tumor necrosis<br><br>factor,<br><br>alpha-induced<br><br>protein 2 | 1.54 | 0.054948 | -1.63 | 0.022261 | -1.29 | 0.77753  | 1.79 | 0.221039 | -1.67 | 0.049895 |
| Tnfsf12 | Tumor necrosis<br><br>factor (ligand)                               | 1.34 | 0.427051 | -1.04 | 0.880147 | 1.17  | 0.642445 | 1.34 | 0.376083 | 1.36  | 0.422035 |

|       |                                                    |      |          |       |          |       |          |      |          |       |          |
|-------|----------------------------------------------------|------|----------|-------|----------|-------|----------|------|----------|-------|----------|
|       | superfamily,<br><br>member 12                      |      |          |       |          |       |          |      |          |       |          |
| Vegfa | Vascular<br><br>endothelial<br><br>growth factor A | 2.63 | 0.163294 | -2.73 | 0.144783 | 1.31  | 0.474909 | 1.51 | 0.236882 | 1.23  | 0.586296 |
| Vegfb | Vascular<br><br>endothelial<br><br>growth factor B | 1.27 | 0.394393 | -1.62 | 0.163299 | -1.19 | 0.667822 | 1.03 | 0.831695 | -1.32 | 0.236643 |
| Vegfc | Vascular<br><br>endothelial<br><br>growth factor C | 1.55 | 0.008534 | -1.77 | 0.02666  | 1.82  | 0.066918 | 1.57 | 0.183306 | 1.9   | 0.034799 |

Fold-change and p-values are listed. Note that large number (22/84) of downregulated genes are observed in *Vegfa* mutants, whereas few genes are found in *Hif1a* or *Epas1* mutants. This table is associated with Figure 3C.

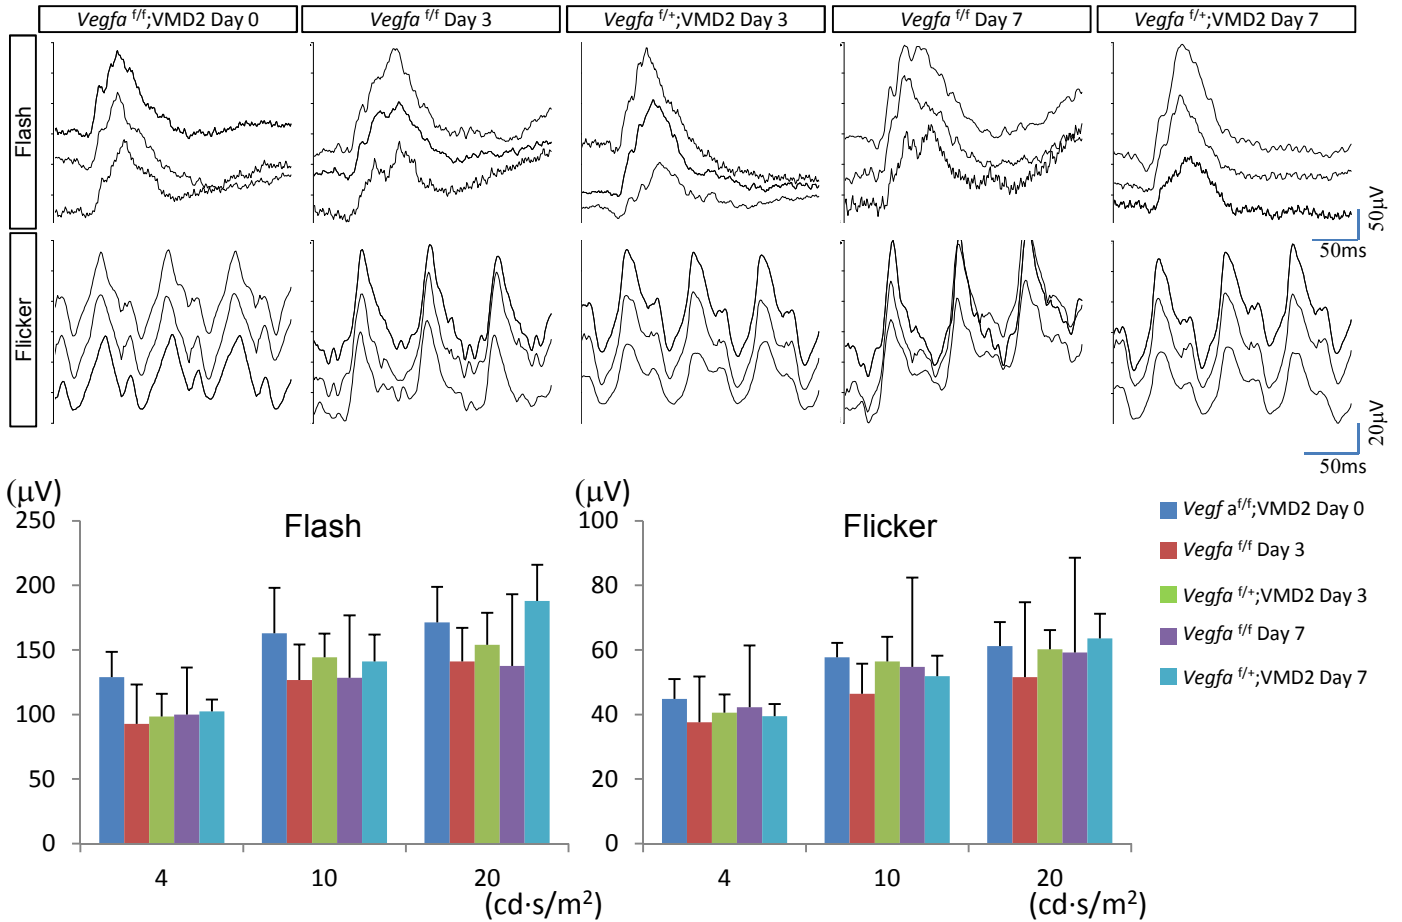

**Figure S1 Photopic light-adapted ERG for multiple controls.**

Note that *Vegfa*<sup>f/f</sup>;(Cre(-)) or *Vegfa*<sup>f/+</sup>;VMD2-Cre mice show no statistically significant differences in photopic ERG after 3 days or 7 days after doxycycline injection compared to *Vegfa*<sup>f/f</sup>;VMD2-Cre without doxycycline injection. These observations indicate that neither doxycycline injection nor Cre expression in RPE affect retinal function.  $n=4$ , respectively. Error bars indicate mean  $\pm$  s.d.

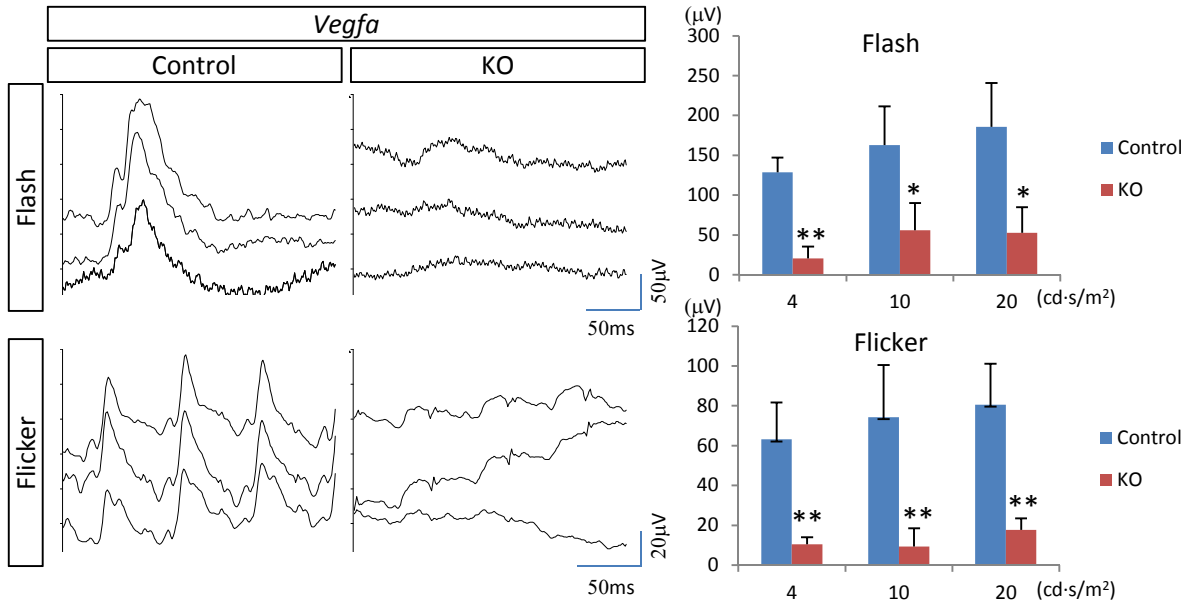

**Figure S2 Photopic light-adapted ERG of *Vegfa* mutants at late stage (7 months after gene deletion).** Note that significant dysfunction compared to age-matched control was observed.  $n=4$ , respectively. \* $P<0.05$ , \*\* $P<0.01$ ; two-tailed Student's  $t$  tests. Error bars indicate mean  $\pm$  s.d.

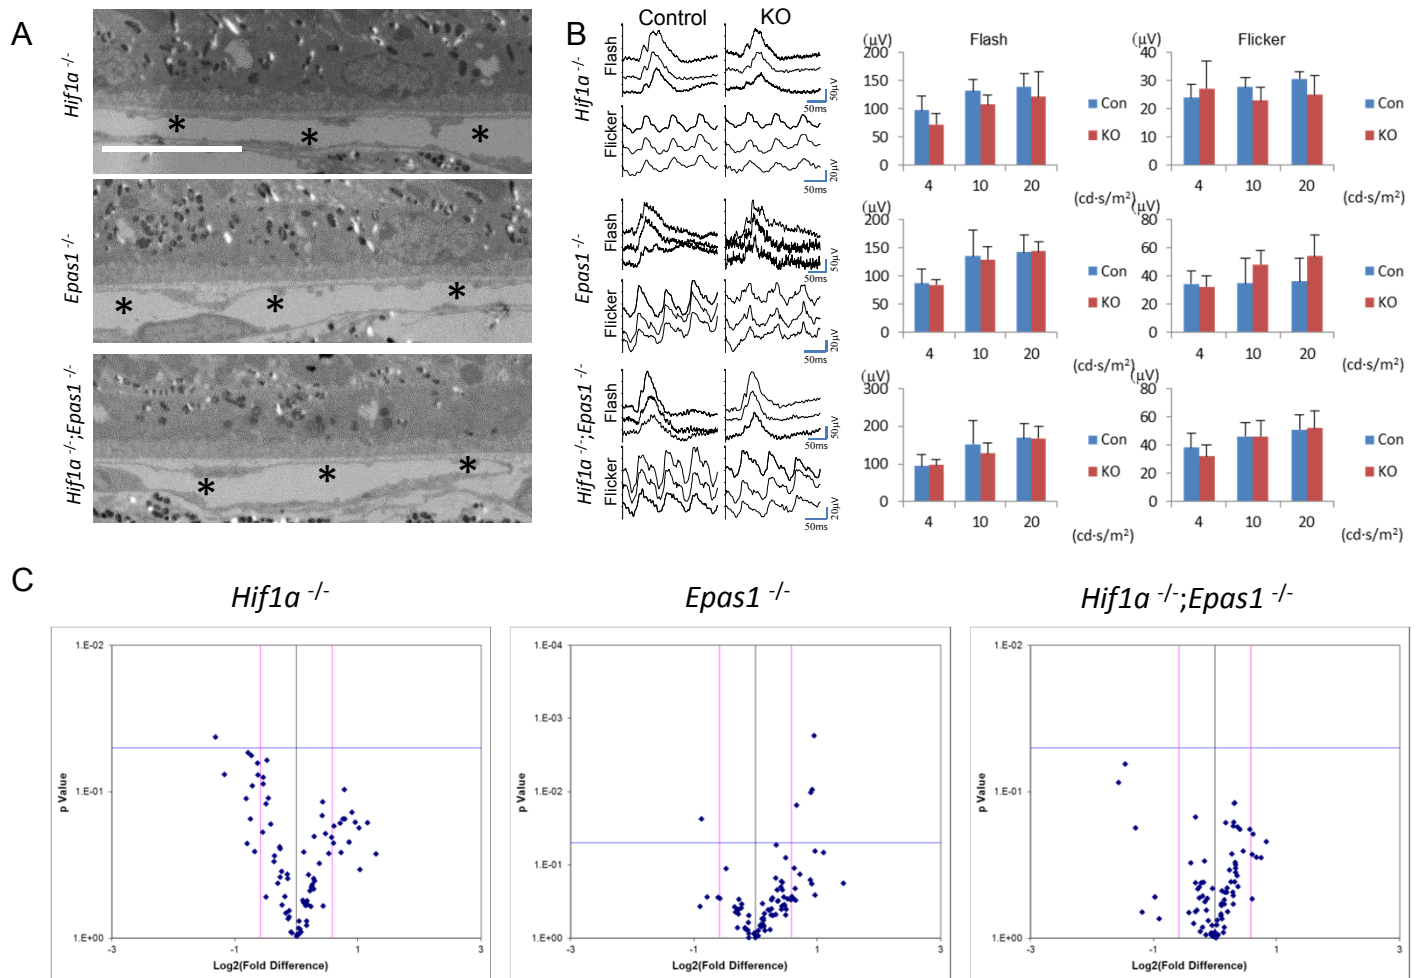

**Figure S3 Phenotypes in naïve state HIF mutants.**

(A) Electron micrographs for *Hif1a*, *Epas1*, and *Hif1a;Epas1* mutants 3 days post-induction. Note that the choriocapillaris in all these animals is intact (asterisks). (B) Photopic light-adapted ERG for *Hif1a*, *Epas1*, and *Hif1a;Epas1* mutants captured 7 days post-induction. Note that no statistically significant reduction of amplitudes is observed ( $n=4$ ). (C) mRNA array for angiogenic genes in *Hif1a*, *Epas1*, and *Hif1a;Epas1* mutant RPE/choroids compared to controls in naïve states ( $n=3$ , respectively). Note that few or no significantly dysregulated genes are observed in naïve state *Hif1a*, *Epas1*, and *Hif1a;Epas1* mutants. Error bars indicate mean  $\pm$  s.d. Scale bar: 10 $\mu$ m for A

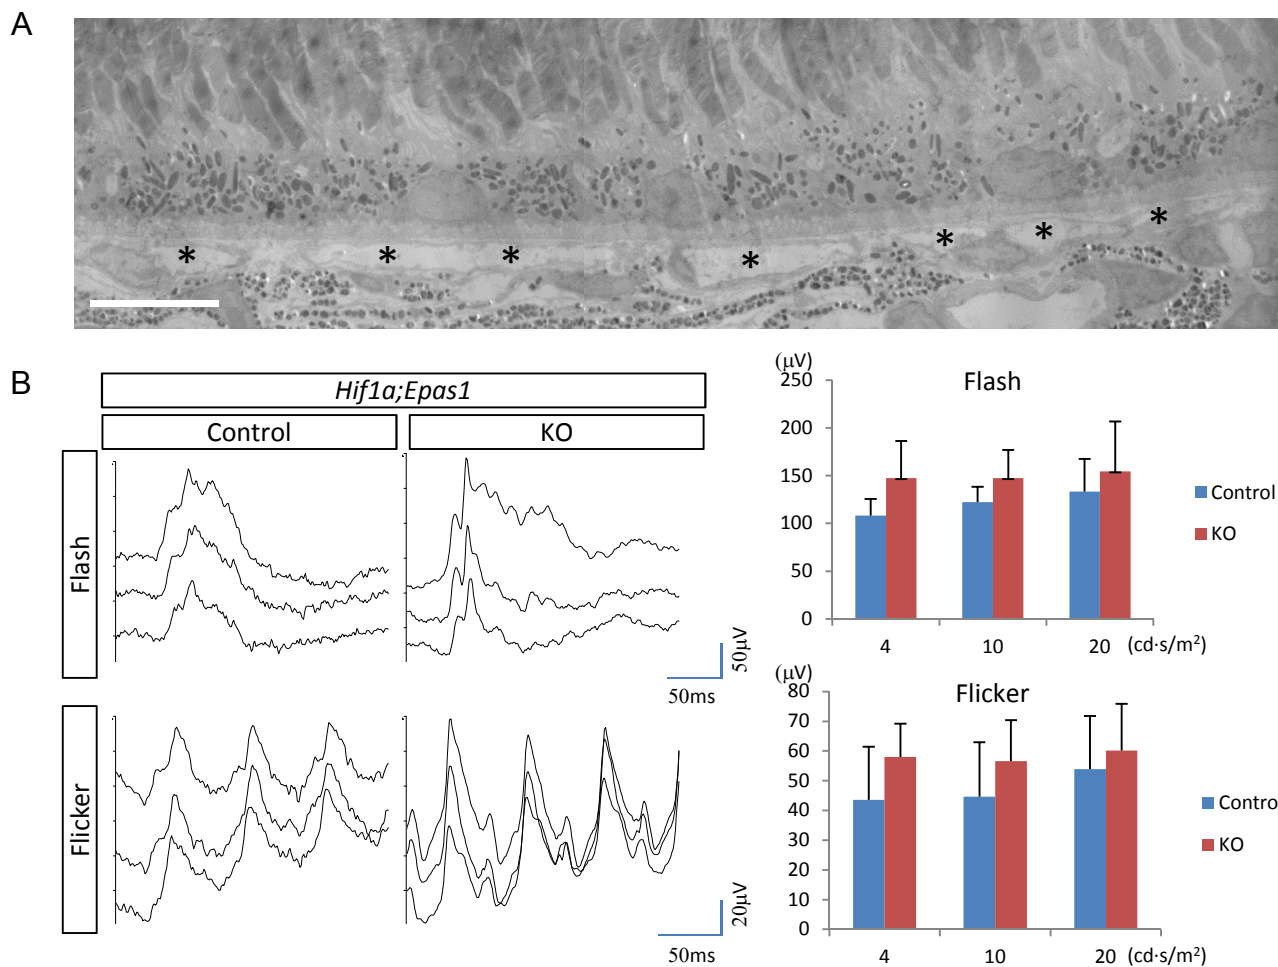

**Figure S4 Phenotypes of *Hif1a/Epas1* double mutants at late stage (7 months after gene deletion).**  
 (A) Electron micrographs for *Hif1a;Epas1* mutants 7 months post-induction. Asterisks indicate intact choriocapillaris. (B) Photopic light-adapted ERG for *Hif1a;Epas1* mutants captured 7 months post-induction. Note that no significant functional and morphological change compared to age-matched control was observed.  $n=4$ , respectively. Error bars indicate mean  $\pm$  s.d. Scale bar: 10 $\mu$ m for A
